# Supplementary material
Source: publisher figshare collection journal article supplement (https://sage.figshare.com/ndownloader/files/17428370)
Supplement: Supplementary file 1 [file 17428370]

## Supplemental File 1: CWE Survey Measures

| Construct                                 | Measure                                                                                          | Description                                                                                                                                                                                                                                                                                                                                                                                                                                                                        | No. of items | Validity and Reliability                                                                                                                                                                                                                                                                                                                                                                                              |
|-------------------------------------------|--------------------------------------------------------------------------------------------------|------------------------------------------------------------------------------------------------------------------------------------------------------------------------------------------------------------------------------------------------------------------------------------------------------------------------------------------------------------------------------------------------------------------------------------------------------------------------------------|--------------|-----------------------------------------------------------------------------------------------------------------------------------------------------------------------------------------------------------------------------------------------------------------------------------------------------------------------------------------------------------------------------------------------------------------------|
| Parent-child Communication (CWE-Reported) | <b>Revised Family Communication Patterns Instrument (RFCP) (Ritchie &amp; Fitzpatrick, 1990)</b> | <p>Captures two family communication patterns as perceived by children</p> <ul style="list-style-type: none"> <li><b>Socio Orientation</b> family communication pattern involves use of parental power to enforce child's overt conformity to the parent (i.e. closed communication)</li> <li><b>Concept Orientation</b> family communication pattern involves parental encouragement of conversation and open exchange of ideas and feelings (i.e. open communication)</li> </ul> | 23           | <p>Good validity and reliability (Koerner &amp; Fitzpatrick, 2002)</p> <p><i>In this study</i>, Cronbach's alpha 0.92 (concept-orientation) and 0.71 (socio-orientation)</p>                                                                                                                                                                                                                                          |
|                                           | <b>Talking to Parents about Epilepsy Affect Scale</b>                                            | Scale developed by authors to assess perceived level of negative & positive affect experienced by CWE after communicating with their parents about epilepsy                                                                                                                                                                                                                                                                                                                        | 6            | <i>In this study</i> , Reliability analysis of this scale revealed Cronbach's alpha of 0.68                                                                                                                                                                                                                                                                                                                           |
| Psychosocial Wellbeing for CWE            | <b>Child Attitude towards Illness Scale (CATIS) (Austin &amp; Huberty, 1993)</b>                 | Assesses children's positive and negative feelings about having a chronic condition                                                                                                                                                                                                                                                                                                                                                                                                | 13           | <p>Demonstrated good validity and internal consistency reliability (Heimlich et al., 2000)</p> <p><i>In this study</i>, coefficient alpha 0.86</p>                                                                                                                                                                                                                                                                    |
|                                           | <b>Self-Perception Profile for Children, (SPPC) (Harter, 1985a)</b>                              | <p>Assesses children's self-esteem across five specific domains</p> <ul style="list-style-type: none"> <li>scholastic competence</li> <li>social acceptance</li> <li>athletic competence</li> <li>physical appearance</li> <li>behavioural conduct</li> </ul> <p>Also, assesses - global self-worth</p>                                                                                                                                                                            | 36           | <p>Good validity and internal consistency reliability (Harter, 1985a)</p> <p><i>In this study</i>, alpha coefficients for all six subscales were;</p> <ul style="list-style-type: none"> <li>0.93 (scholastic competence)</li> <li>0.87 (social acceptance)</li> <li>0.92 (athletic competence)</li> <li>0.92 (physical appearance)</li> <li>0.84 (behavioural conduct)</li> <li>0.93 (global self-worth).</li> </ul> |
|                                           | <b>Health-Related Quality of Life Measure for CWE (CHEQOL) (Ronen,</b>                           | <p>Five subscales measuring</p> <ul style="list-style-type: none"> <li>interpersonal/social consequences</li> <li>worries and concerns</li> <li>intrapersonal/emotional issues</li> </ul>                                                                                                                                                                                                                                                                                          | 25           | <p>Good validity and internal consistency reliability (Ronen et al., 2003)</p> <p><i>In this study</i>, alpha coefficients for five</p>                                                                                                                                                                                                                                                                               |

|  |                                                                                                                                       |                                                                                                                                                                                                                                           |    |                                                                                                                                                                                                                                                                                                                     |
|--|---------------------------------------------------------------------------------------------------------------------------------------|-------------------------------------------------------------------------------------------------------------------------------------------------------------------------------------------------------------------------------------------|----|---------------------------------------------------------------------------------------------------------------------------------------------------------------------------------------------------------------------------------------------------------------------------------------------------------------------|
|  | <b>Streiner &amp; Rosenbaum, 2003).</b>                                                                                               | <ul style="list-style-type: none"> <li>• epilepsy my secret</li> <li>• quest for normality.</li> </ul>                                                                                                                                    |    | subscales were; <ul style="list-style-type: none"> <li>• 0.89 (interpersonal/social consequences)</li> <li>• 0.77 (worries and concerns)</li> <li>• 0.77 (intrapersonal/emotional issues)</li> <li>• 0.76 (epilepsy my secret)</li> <li>• 0.71 (quest for normality).</li> </ul>                                    |
|  | <b>Social Support Scale for Children and Adolescents (SSSCA) (Harter, 1985b)</b>                                                      | Assesses children's perceptions of social support from four sources – four subscales <ul style="list-style-type: none"> <li>• parent support</li> <li>• friend support</li> <li>• classmate support</li> <li>• teacher support</li> </ul> | 24 | Good validity and internal consistency reliability (Harter, 1985b)<br><br><i>In this study</i> , Cronbach's alpha were; <ul style="list-style-type: none"> <li>• 0.81 for parental support</li> <li>• 0.94 for friend support</li> <li>• 0.81 for classmate support</li> <li>• 0.81 for teacher support.</li> </ul> |
|  | <b>Child Need for Information and Support measure (Subscale of the Child Report of Psychosocial Care Scale) (Austin et al., 1998)</b> | Subscale measures CWE's need for information and support relating to their epilepsy.                                                                                                                                                      | 6  | Good validity and internal consistency reliability (Austin et al., 1998)<br><br><i>In this study</i> , coefficient alpha was 0.83.                                                                                                                                                                                  |
|  | <b>Child Information Received measure (Subscale of the Child Report of Psychosocial Care Scale) (Austin et al., 1998)</b>             | Subscale measures CWE's perceived satisfaction with level of information received from healthcare professionals about their epilepsy.                                                                                                     | 6  | Good validity and internal consistency reliability (Austin et al., 1998).<br><br><i>In this study</i> , coefficient alpha was 0.69.                                                                                                                                                                                 |
